# Supplementary material
Source: MDPI journal article supplement (https://www.mdpi.com/search?q=cancers-11-00847)
Supplement: s001 [file cancers-11-00847-s001.pdf]

# <sup>11</sup>C-hydroxy-ephedrine-PET/CT in the Diagnosis of Pheochromocytoma and Paraganglioma

Achyut Ram Vyakaranam <sup>1,4,\*</sup>, Joakim Crona <sup>2,3</sup>, Olov Norlén <sup>4</sup>, Per Hellman <sup>4</sup> and Anders Sundin <sup>1,4</sup>

<sup>1</sup> Section of Radiology & Molecular Imaging, Department of Surgical Sciences, Uppsala University, Akademiska Sjukhuset, SE-751 85 Uppsala, Sweden; anders.sundin@radiol.uu.se

<sup>2</sup> Department of Medical Sciences, Uppsala University, Akademiska Sjukhuset, SE-751 85 Uppsala, Sweden; joakim.crona@medsci.uu.se

<sup>3</sup> Department of Immunology, Genetics and Pathology; Uppsala University, Akademiska Sjukhuset, SE-751 85 Uppsala, Sweden

<sup>4</sup> Department of Surgical Sciences, Uppsala University, Akademiska Sjukhuset, SE-751 85 Uppsala, Sweden; olov.norlen@surgsci.uu.se (O.N.); per.hellman@surgsci.uu.se (P.H.)

\* Correspondence: achyutram.vyakaranam@surgsci.uu.se

Received: 11 June 2019; Accepted: 16 June 2019; Published: 19 June 2019

**Table S1.** CT and PET/CT parameters in 40 patients with <sup>11</sup>C-HED-negative tumors. PCC;pheochromocytoma, PGL;paraganglioma, HT;hypertension, NET;neuroendocrine tumor, AAA;adrenocortical adenoma, ND;not done, BP;blood pressure, L;left, R;right, Retroper;retroperitoneum, HU;Hounsfield Units, CECT;contrast-enhanced CT, A;epinephrine, NA;norepinephrine, FU;follow-up.

| Pat No. | Age | Sex | Clinical information        | Incidentaloma | Indication for <sup>11</sup> C-HED-PET/CT | Systolic BP | Location L/R | Size (L,R) cm | Attenuation (L, R) (HU) | Tumor SUVmax | Normal adrenal SUVmax | Normal liver SUVmean | Tumor/Normal adrenal Ratio | Tumor/Liver Ratio | Final Diagnosis (PAD/FU) | U-NA (< 40) | U-A (< 90) | P-Met-NA (< 0.6) | P-Met-A (< 0.3) | P-met-tyramine (< 0.2) |
|---------|-----|-----|-----------------------------|---------------|-------------------------------------------|-------------|--------------|---------------|-------------------------|--------------|-----------------------|----------------------|----------------------------|-------------------|--------------------------|-------------|------------|------------------|-----------------|------------------------|
| 27      | 63  | F   | Palpitations, sweating, HT  | N             | Biochemistry                              | 210         | L            | 2.5           | -10                     | 3.5          | 3.5                   | 4.6                  | 1.00                       | 0.76              | AAA                      | 635         | 92         | 0.6              | 0.2             | 3                      |
| 28      | 54  | M   | Incidentaloma               | Y             | HT, biochemistry                          | 170         | L            | 3.5           | -20                     | 8.2          | 9.8                   | 4.5                  | 0.84                       | 1.82              | AAA                      | 550         | 77         | 0.4              | 0.2             |                        |
| 29      | 65  | M   | No symptoms                 | Y             | Rule out PCC                              | 140         | L            | 2.5           | -20                     | 12.6         | 10                    | 4.6                  | 1.26                       | 2.74              | Benign on FU (AAA)       |             |            | 0.8              | 0.2             |                        |
| 30      | 55  | M   | No symptoms                 | Y             | Biochemistry                              | 140         | L/R          | 3.5           | 1                       | 6.5          | 4.8                   | 4.4                  | 1.35                       | 1.48              | Bilateral AAA            |             |            | 3                | 0.2             |                        |
| 31      | 61  | F   | Insulinoma<br>Incidentaloma | Y             | Rule out PCC                              | 150         | L            | 1.5           | -12                     | 10.4         | 8.1                   | 4.3                  | 1.28                       | 2.42              | Benign on FU (AAA)       | 980         | 130        |                  |                 |                        |
| 32      | 53  | F   | Incidentaloma, biochemistry | Y             | Rule out MTC metastasis                   | 160         | L            | 1             | >10                     | 11.4         | 7.6                   | 6.6                  | 1.50                       | 1.73              | MTC metastasis (FU)      |             |            | 1                | 0.2             |                        |
| 33      | 68  | M   | Headache, HT                | N             | Rule out PCC                              | 200         | L            | 1             | <0                      | 6.5          | 5.5                   | 4.4                  | 1.18                       | 1.48              | Benign on FU (AAA)       |             |            | 1                | 0.2             |                        |
| 34      | 59  | F   | Incidentaloma               | Y             | Rule out PCC                              | 160         | R            | 1.5           | >10                     | 4.3          | 4                     | 4.3                  | 1.08                       | 1.00              | Benign on FU (AAA)       |             |            | 1.4              | 0.2             |                        |

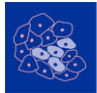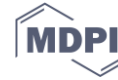

|    |    |   |                             |   |                                 |         |           |       |      |      |      |     |      |      |                                 |      |     |     |     |     |
|----|----|---|-----------------------------|---|---------------------------------|---------|-----------|-------|------|------|------|-----|------|------|---------------------------------|------|-----|-----|-----|-----|
| 35 | 58 | F | Headache, abdominal pain    | Y | HT, biochemistry                | 210     | R         | 1.5   | 10   | 7.7  | 3.6  | 5   | 2.14 | 1.54 | Cyst and AAA                    |      | 0.5 | 0.3 | 2.6 |     |
| 36 | 47 | F | Incidentaloma               | Y | Rule out lung cancer metastasis | 145     | L         | 1.5   | CECT | 4    | 4.6  | 4   | 0.87 | 1.00 | Lung cancer metastasis (Biopsy) |      | 0.6 | 0.2 |     |     |
| 37 | 58 | F | Incidentaloma               | Y | Rule out lung cancer metastasis | 145     | R         | 4.5   | ND   | ND   | 7.7  | 5   | ND   | ND   | Lung cancer metastasis (Biopsy) |      | 0.3 | 0.2 |     |     |
| 38 | 60 | F | Flushes, panic attack       | N | Rule out PGL                    | 230     | Abdomen   | 4     | ND   | 6    | 5    | 4.5 | 1.20 | 1.33 | Benign on FU (Hematoma)         | 1212 | 59  | 0.6 | 0.2 |     |
| 39 | 58 | F | Palpitations, HT            | Y | Rule out PCC                    | 180     | R         | 1.2   | 25   | 6.6  | 8    | 5   | 0.83 | 1.32 | Benign on FU (AAA)              | 1430 | 96  | 0.2 | 0.2 |     |
| 40 | 62 | M | Panic attack, biochemistry  | Y | Rule out PCC                    | 210     | L         | 1.5   | >10  | 11.4 | 7.9  | 5   | 1.44 | 2.28 | Benign on FU (hyperplasia)      | 1100 | 150 | 0.3 | 0.3 |     |
| 41 | 66 | M | No symptoms                 | Y | Rule out PGL                    | 150     | Retr oper | 6     | ND   | 4    | 3.2  | 4.8 | 1.25 | 0.83 | Benign on FU (Neurofibroma)     |      |     | 0.4 | 0.3 |     |
| 42 | 63 | M | No symptoms                 | Y | Biochemistry                    | 130     | R         | 2.5   | <10  | 3    | 4.3  | 6.2 | 0.70 | 0.48 | AAA                             | 560  | 95  | 1   | 0.2 | 1.5 |
| 43 | 66 | M | Biochemistry                | Y | Rule out Bilateral PCC          | 160     | L/R       | 2.5   | 0 8  | 4.9  | 3    | 5.5 | 1.63 | 0.89 | Benign on FU (AAA)              | 620  | 46  | 1   | 0.2 |     |
| 44 | 72 | M | Palpitations                | Y | Rule out Bilateral PCC          | 160     | L/R       | 3 1   | CECT | 9.9  | 9.3  | 5   | 1.06 | 1.98 | AAA                             |      | 180 | 0.3 | 0.2 |     |
| 45 | 60 | F | HT                          | Y | Rule out bilateral PCC          | 170     | L/R       | 2 2   | CECT | 8.3  | 5.3  | 4   | 1.57 | 2.08 | L+R nodular hyperplasia         |      | 195 | 0.3 | 0.2 |     |
| 46 | 54 | F | Incidentaloma, biochemistry | Y | Rule out bilateral PCC          | 140     | L/R       | 2.5 1 | -90  | 9    | 6    | 7.3 | 1.50 | 1.23 | Benign on FU (Myelolipoma)      |      |     | 1.5 | 0.2 |     |
| 47 | 59 | F | Incidentaloma               | Y | Rule out bilateral PCC          | 175     | L/R       | 1.2 1 | <0   | 4.8  | 4.2  | 4.5 | 1.14 | 1.07 | Benign on FU (AAA)              | 580  | 100 |     |     |     |
| 48 | 50 | M | Incidentaloma               | Y | Rule out bilateral PCC          | 170     | L/R       | 2.5 1 | 2 28 | 5    | 6.5  | 4   | 0.77 | 1.25 | Benign on FU (AAA)              |      |     | 0.4 | 0.2 |     |
| 49 | 64 | M | Incidentaloma               | Y | Rule out bilateral PCC          | No info | L/R       | 1 2   | <0   | 11.4 | 10   | 5   | 1.14 | 2.28 | Benign on FU (AAA)              |      |     | 0.4 | 0.2 |     |
| 50 | 72 | F | Incidentaloma               | Y | Rule out bilateral PCC          | no info | L/R       | 2.5 1 | <0   | 9    | 8    | 5.4 | 1.13 | 1.67 | Benign on FU (AAA)              |      |     | 0.3 | 0.2 |     |
| 51 | 54 | F | Incidentaloma               | Y | HT and bilateral incidentaloma  | 160     | L/R       | 2 2   | <10  | 6.8  | 8.2  | 6.5 | 0.83 | 1.05 | Bilateral AAA                   |      |     | 0.3 | 0.2 |     |
| 52 | 64 | M | Unclear symptoms            | N | Rule out bilateral PCC          | no info | L/R       | 3 1   | -20  | 9    | 15.5 | 5.4 | 0.58 | 1.67 | Benign on FU (AAA)              |      |     | 0.3 | 0.2 |     |
| 53 | 70 | M | Unclear symptoms            | N | Biochemistry                    | 180     | L         | 1     | >10  | 4.5  | 2.8  | 4   | 1.61 | 1.13 | Benign on FU (AAA)              |      |     | 1.1 | 0.2 |     |
| 54 | 73 | F | Headache, HT                | N | HT, Biochemistry                | 190     | L         | 2.5   | -20  | 7.5  | 8.5  | 6.5 | 0.88 | 1.15 | AAA                             |      |     | 1.4 | 0.2 |     |
| 55 | 59 | M | Tachycardia, headache, HT   | N | Biochemistry                    | 175     | L         | 3     | CECT | 6.9  | 6.8  | 5   | 1.01 | 1.38 | AAA                             |      |     | 0.3 | 0.2 | 1.5 |
| 56 | 77 | M | Sweating, HT                | N | Biochemistry                    | 180     | L         | 1     | <0   | 5    | 5    | 5.8 | 1.00 | 0.86 | Benign on FU (AAA)              |      |     | 1   | 0.2 |     |
| 57 | 55 | M | Polydipsia, HT              | N | Rule out PCC                    | 230     | L         | 2     | -10  | 4.2  | 6    | 4   | 0.70 | 1.05 | Benign on FU (AAA)              | 625  | 87  | 0.3 | 0.2 |     |
| 58 | 51 | M | Unclear symptoms            | N | Biochemistry                    | 160     | L         | 1     | >10  | 8.6  | 8.7  | 4.5 | 0.99 | 1.91 | Benign on FU (AAA)              | 670  | 120 | 0.3 | 0.2 |     |
| 59 | 41 | M | HT                          | N | HT, biochemistry                | 190     | L         | 3     | 26   | 5.6  | 9.9  | 5   | 0.57 | 1.12 | AAA                             | 1150 | 60  | 0.7 | 0.2 |     |

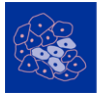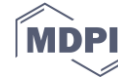

|    |    |   |                                 |   |                                 |     |   |     |      |      |      |      |      |      |                    |                    |     |     |     |     |
|----|----|---|---------------------------------|---|---------------------------------|-----|---|-----|------|------|------|------|------|------|--------------------|--------------------|-----|-----|-----|-----|
| 60 | 63 | F | Incidentaloma                   | Y | Rule out lung cancer metastasis | 140 | L | 1   | CECT | 12.6 | 11   | 6.8  | 1.15 | 1.85 | Benign on FU (AAA) |                    |     | 0.5 | 0.2 |     |
| 61 | 56 | F | Incidentaloma                   | Y | Rule out PCC                    | 150 | L | 1.5 | ND   | 15   | 16.5 | 8    | 0.91 | 1.88 | Benign on FU (AAA) |                    |     | 0.3 | 0.2 |     |
| 62 | 66 | M | Incidentaloma                   | Y | Rule out lung cancer metastasis | 180 | R | 3   | -10  | 5.6  | 5.5  | 5.5  | 1.02 | 1.02 | AAA                |                    |     | 0.3 | 0.2 |     |
| 63 | 54 | M | Sweating, flushes, palpitations | N | Biochemistry                    | 130 | R | 2   | -10  | 5.6  | 5.4  | 5    | 1.04 | 1.12 | Benign on FU (AAA) | 1560               | 145 | 2.2 | 0.8 |     |
| 64 | 48 | M | Sweating                        | N | Biochemistry                    | 140 | R | 1   | 30   | 3.2  | 3.6  | 2.9  | 0.89 | 1.10 | AAA                | 800                | 66  |     | 2.7 |     |
| 65 | 61 | F | HT, arrythmia                   | N | Rule out PCC                    | 175 | L | 2   | CECT | 10.1 | 7.2  | 5    | 1.40 | 2.02 | Benign on FU (AAA) |                    |     | 0.6 | 0.2 |     |
| 66 | 57 | F | HT, palpitations sweating       | N | Biochemistry                    | 160 | R | 1   | 1    | ND   | 9.7  | 10.7 | 8.23 | 0.91 | 1.18               | Benign on FU (AAA) |     |     | 1.9 | 0.2 |

**Table S2.** Size and  $^{11}\text{C}$ -HED accumulation (standardized uptake value, SUV) in  $^{11}\text{C}$ -HED-PET/CT positive tumors.

|         | Tumor size (cm) | Tumor SUV <sub>max</sub> | Normal adrenal SUV <sub>max</sub> | Normal Liver SUV <sub>mean</sub> | Tumor-to-normal adrenal-ratio | Tumor-to-normal liver-ratio |
|---------|-----------------|--------------------------|-----------------------------------|----------------------------------|-------------------------------|-----------------------------|
| Mean±SD | 3.35±1.95       | 14.83±8.78               | 8.36±3.31                         | 5.05±0.89                        | 2.05±1.64                     | 3.03±1.89                   |
| Min     | 1.00            | 5.20                     | 3.80                              | 3.40                             | 0.67                          | 1.00                        |
| Max     | 8.00            | 46.50                    | 17.00                             | 7.90                             | 7.05                          | 8.94                        |

**Table S3.** Statistical analysis of various parameters using t-test assuming unequal variances.

|                                                                                        | Tumor SUV <sub>max</sub> | Systolic BP | T/L    |
|----------------------------------------------------------------------------------------|--------------------------|-------------|--------|
| Patients with sympathetic hyperactivity versus those without sympathetic hyperactivity | 0.21                     | 0.9         | 0.15   |
| Tumor size versus SUV <sub>max</sub> , systolic BP and T/L ratio                       |                          |             |        |
| Cut-off = 2 cm                                                                         | 0.07                     | 0.23        | 0.03   |
| Cut-off = 4 cm                                                                         | 0.045*                   |             | 0.033* |
| Low NA vs High NA                                                                      |                          |             |        |
| Cut-off = > 2 times reference                                                          | 0.12                     | 0.024*      | 0.044* |
| Cut-off = > 10 times reference                                                         | 0.035*                   | 0.015*      | 0.009* |
| High systolic BP                                                                       |                          |             |        |
| Cut-off = >180                                                                         | 0.36                     |             | 0.26   |
| Cut-off = >200                                                                         | 0.37                     |             | 0.20   |

\*  $p < 0,05$ , BP;blood pressure, NA;norepinephrine, SUV<sub>max</sub>;maximum standard uptake value, T/L;tumor-to-liver ratio (ratio of tumor SUV<sub>max</sub> and liver SUV<sub>mean</sub>).

**Table 3.** CT characteristics and PET/CT parameters in the 20 patients with <sup>11</sup>C-HED- positive adrenal tumors which after surgery were histopathologically confirmed as pheochromocytoma (PCC). HT;hypertension, NET;neuroendocrine tumor, BP;blood pressure, CECT;contrast-enhanced CT. AAA;adrenocortical adenoma, ND;not done, L;left, R;right, A;epinephrine, NA,nor-epinephrine, \*;Lesion represents an AAA, A-Ref;value/upper normal reference value; NA-Ref;value/upper normal reference value.

| Pat No. | Age | Sex | Clinical information                                        | Incidentaloma | Systolic BP | Location | Size (L, R) cm |       | Attenuation (L,R) (HU) |       | Tumor SUVmax | Normal adrenal SUV <sub>max</sub> | Normal liver SUV <sub>mean</sub> | Tumor / Adrenal Ratio | Tumor / Liver Ratio | Diagnosis (PAD)       | U-NA (< 400) | U-A (< 90) | U-Met-NA (< 2.5) | U-Met-A (< 1.5) | P-Met-NA (< 0.6) | P-Met-A (< 0.3) | NA-Ref | A-Ref | A(NR) ratio |
|---------|-----|-----|-------------------------------------------------------------|---------------|-------------|----------|----------------|-------|------------------------|-------|--------------|-----------------------------------|----------------------------------|-----------------------|---------------------|-----------------------|--------------|------------|------------------|-----------------|------------------|-----------------|--------|-------|-------------|
| 1       | 45  | F   | Sweating, palpitations anxiety                              | Y             | 220         | L        | 6              | 1*    | 10                     | -20   | 23           | 3.8                               | 3.4                              | 6.05                  | 6.76                | L PCC<br>R AAA        | 12000        | 130        |                  |                 | 6.9              | 0.2             | 11.5   | 1.00  | 0.09        |
| 2       | 73  | F   | Palpitations, headache, HT, alpha blocker                   | Y             | 150         | R        |                | 1.51* |                        | 10-15 | 7.7          | 7.2                               | 6                                | 1.07                  | 1.28                | R PCC+AAA             |              |            |                  |                 | 1.2              | 0.7             | 2.00   | 3.50  | 1.75        |
| 3       | 67  | F   | Sweating, headache, alpha blocker                           | Y             | 150         | R        | 1*             | 2     | CECT                   |       | 12           | 9.8                               | 5                                | 1.22                  | 2.40                | R PCC<br>L AAA        |              |            |                  |                 | 0.8              | 0.2             | 1.33   | 1.00  | 0.75        |
| 4       | 48  | F   | Anxiety, palpitations, muscle fasciculations, alpha blocker | Y             | 150         | L        | 4              |       | CECT                   |       | 21.8         | 5.7                               | 4.2                              | 3.82                  | 5.19                | PCC                   | 10627        |            |                  |                 | 7.7              | 0.2             | 12.8   | 1.00  | 0.08        |
| 5       | 85  | F   | Rectal cancer Incident adenoma                              | Y             | 140         | L        | 5              |       | ND                     |       | 21.1         | 6.3                               | 4.7                              | 3.35                  | 4.49                | PCC with cystic areas | 680          |            |                  |                 | 6.4              | 0.2             | 10.7   | 1.00  | 0.09        |
| 6       | 53  | F   | Polycystic kidney disease, HT                               | Y             | 180         | L        | 4.5            |       | 40                     |       | 19.8         | 8.2                               | 7                                | 2.41                  | 2.83                | PCC                   |              |            |                  |                 | 0.6              | 1               | 1.00   | 5.00  | 5.00        |

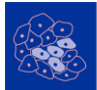

|    |    |   |                                          |   |     |     |   |     |      |      |      |     |      |      |                       |      |     |      |      |      |      |      |      |      |      |
|----|----|---|------------------------------------------|---|-----|-----|---|-----|------|------|------|-----|------|------|-----------------------|------|-----|------|------|------|------|------|------|------|------|
| 7  | 52 | M | No symptoms                              | Y | 190 | R   |   | 2   | >20  | 25   | 5    | 4.9 | 5.00 | 5.10 | PCC                   | 800  | 130 |      |      |      |      |      | 2.00 | 1.44 | 0.72 |
| 8  | 71 | F | Breast cancer, small-intestinal NET      | Y | 150 | L   | 1 |     | >20  | 21.9 | 7.3  | 7.9 | 3.00 | 2.77 | PCC                   | 222  | 46  | 1.5  | 0.8  |      |      |      | 0.56 | 0.51 | 0.92 |
| 9  | 19 | F | Bilateral incident alomas                | Y | 180 | L/R | 2 | 2   | >20  | 21   | 17   | 5   | 1.24 | 4.20 | PCC                   |      |     |      |      | 1.1  | 0.7  | 1.83 | 3.50 | 1.91 |      |
| 10 | 58 | F | Palpitations, alpha blocker              | Y | 130 | L/R | 2 | 2   | ND   | 13.2 | 12.8 | 4.3 | 1.03 | 3.07 | PCC                   |      |     |      |      | 0.8  | 0.2  | 1.33 | 1.00 | 0.75 |      |
| 11 | 28 | F | No symptoms                              | Y | 120 | L/R | 2 | 2.5 | >20  | 6.5  | 6.5  | 4.6 | 1.00 | 1.41 | PCC                   |      |     | 3.9  | 3.2  |      |      |      | 1.56 | 2.13 | 1.37 |
| 12 | 30 | F | Palpitations, panic attack               | N | 110 | L/R | 2 | 2   | 30   | 30   | 13.3 | 8.3 | 5.3  | 1.60 | 2.51                  | PCC  | 354 | 272  |      |      | 0.8  |      | 1.33 | 3.02 | 2.27 |
| 13 | 72 | F | Sweating, alpha blocker                  | N | 220 | R   |   | 2.5 | ND   | 12.6 | 8.3  | 5.7 | 1.52 | 2.21 | PCC                   | 1495 | 150 |      |      |      |      |      | 3.74 | 1.67 | 0.45 |
| 14 | 50 | F | Palpitations, headache, HT               | N | 215 | R   |   | 6   | >20  | 12.9 | 9.5  | 4   | 1.36 | 3.23 | PCC                   |      |     |      |      | 37   | 19   | 61.7 | 9.50 | 1.54 |      |
| 15 | 59 | M | Incident aloma                           | Y | 200 | L   | 2 |     | >20  | 5.2  | 3.8  | 4.4 | 1.37 | 1.18 | Benign PCC            | 652  | 160 |      |      | 0.6  | 0.5  | 1.00 | 2.50 | 2.50 |      |
| 16 | 42 | F | Palpitations, sweating, headache, tremor | N | 130 | L   | 6 |     | CECT | 8.2  | 12.3 | 6   | 0.67 | 1.37 | PCC with cystic areas |      |     | 6.7  | 14.7 |      |      |      | 2.68 | 9.80 | 3.66 |
| 17 | 58 | F | Sweating, palpitations HT, alpha blocker | N | 170 | L   | 8 |     | ND   | 13.7 | 8.2  | 5.5 | 1.67 | 2.49 | PCC with necrosis     |      |     | 13.1 | 29.7 | 5.3  | 7.9  | 8.83 | 3.95 | 4.47 |      |
| 18 | 64 | M | HT, alpha blocker                        | N | 220 | R   |   | 6   | ND   | 31   | 6.5  | 4.5 | 4.77 | 6.89 | PCC with necrosis     |      |     |      |      | 13.4 | 21.3 | 22.3 | 1.07 | 4.77 |      |

|    |    |   |                                                           |   |     |   |   |   |    |     |      |   |      |      |                     |      |     |  |  |     |     |   |   |      |      |      |
|----|----|---|-----------------------------------------------------------|---|-----|---|---|---|----|-----|------|---|------|------|---------------------|------|-----|--|--|-----|-----|---|---|------|------|------|
| 19 | 61 | F | Headache, flushing, sweating, palpitations, alpha blocker | N | 230 | L | 3 | 1 | 38 | 5.2 | 17.7 | 5 | 5.36 | 3.54 | L PCC R hyperplasia | 4567 | 350 |  |  |     |     |   |   | 11.4 | 3.89 | 0.34 |
| 20 | 65 | F | Sweating, palpitations, alpha blocker                     | N | 140 | R |   | 2 | 24 | 8.4 | 4.3  | 4 | 1.95 | 2.1  | PCC                 |      |     |  |  | 1.2 | 0.3 | 2 | 1 |      |      | 0.5  |

**Table 4.** CT characteristics and PET/CT parameters in 6 patients with <sup>11</sup>C-HED uptake in extra-adrenal sites which after surgery were histopathologically confirmed as paragangliomas (PGL). HT;hypertension, , BP;blood pressure, ND;not done, HU;Hounsfield Units, CECT;contrast-enhanced CT, A;epinephrine, NA;norepinephrine.

| Pat No. | Age | Sex | Clinical information       | Incidentaloma | Systolic BP | Location    | Tumor size (cm) | Attenuation (HU) | Tumor SUVmax | Normal adrenal SUVmax | Normal liver SUVmean | Tumor/Normal adrenal Ratio | Tumor SUVmax/ Liver SUVmean Ratio | Diagnosis (PAD) | U-NA (< 400) | U-A (< 90) | P-Met-NA (< 0.6) | P-Met-A (< 0.3) | P-met-tyramine (< 0.2) | NA    | A     | A/N A Ratio |
|---------|-----|-----|----------------------------|---------------|-------------|-------------|-----------------|------------------|--------------|-----------------------|----------------------|----------------------------|-----------------------------------|-----------------|--------------|------------|------------------|-----------------|------------------------|-------|-------|-------------|
| 21      | 60  | F   | Back pain                  | Y             | 145         | Para-aortic | 5               | CECT             | 46.5         | 6.6                   | 5.2                  | 7.05                       | 8.94                              | PGL             |              |            | 3.7              | 0.2             | 0.4                    | 6.177 | 0.677 | 0.11        |
| 22      | 34  | F   | Headache, palpitations     | N             | 220         | Pre-aortic  | 4               | >30              | 14.5         | 11.4                  | 5                    | 1.27                       | 2.90                              | PGL             | 6223         | 90         | 11               | 0.2             |                        | 1.837 | 0.677 | 0.04        |
| 23      | 16  | M   | Palpitations, headache, HT | N             | 180         | Pre-aortic  | 4               | >30              | 6.2          | 6.3                   | 4.4                  | 0.98                       | 1.41                              | PGL             |              |            | 1                | 0.6             |                        | 1.677 | 0.707 | 1.20        |
| 24      | 71  | M   | Abdominal pain             | N             | 130         | Pre-aortic  | 7               | ND               | 12.2         | 7.7                   | 4.2                  | 1.58                       | 2.90                              | Metastatic PGL  |              |            | 0.3              | 0.2             | 1.1                    | 0.567 | 0.707 | 1.33        |
| 25      | 56  | M   | Abdominal pain             | Y             | 180         | Pre-aortic  | 4               | >50              | 8.8          | 6.1                   | 5.4                  | 1.44                       | 1.63                              | Metastatic PGL  | 595          | 37         | 1.5              | 0.2             | 0.5                    | 2.567 | 0.707 | 0.27        |
| 26      | 70  | M   | Unclear symptoms           | N             | 135         | Left femur  | 4.5             | ND               | 4.6          | 4                     | 6                    | 1.50                       | 1.00                              | Metastatic PGL  |              |            | 1.4              | 0.2             | 0.8                    | 2.367 | 0.377 | 0.29        |

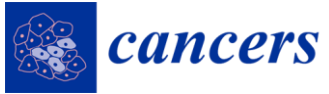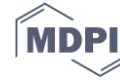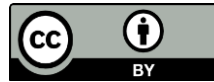

© 2019 by the authors. Submitted for possible open access publication under the terms and conditions of the Creative Commons Attribution (CC BY) license (<http://creativecommons.org/licenses/by/4.0/>).
